# Supplementary material for: Specialized impulse conduction pathway in the alligator heart
Source: eLife. 2018 Mar 22;7:e32120. doi: 10.7554/eLife.32120 (PMC5940360; doi:10.7554/eLife.32120)
Supplement: Source data 1. — Sheet ‘Figure 1E' gives the parameters of the ECGs of the hearts used for optical mapping and surgical cuts. Sheet ‘In situ hybridization’ provides an overview of all in situ hybridization and in which figures the data is shown. Sheet ‘Figure 7E, F' gives the parameters of the ECGs of the animals that were heated to mammalian body temperatures, summarized in Figure 7E, F. [file elife-32120-data1.xlsx]

## Sheet: Figure 1E
		in vivo									ex vivo
Alligator		RR (s)	Heart rate (bpm)	PR (s)	QRS (s)	QT (s)	QTc (s)		Alligator		RR (s)	Heart rate (bpm)	PR (s)	QRS (s)	QT (s)	QTc (s)
1		1.732	34.64	0.3081	0.09582				1		2.926	20.51	0.7733	0.08579	1.809	1.058
2		1.713	35.03	0.3609	0.1414	1.102	0.841982		2		3.311	18.12	0.9652	0.071	1.672	0.9188
3		1.944	30.86	0.3477	0.117	1.37	0.9827		3		2.827	21.22	0.8166	0.131	1.552	0.9232
4		2.134	28.12	0.3299	0.07455	1.425	0.9752		4		2	30	0.4856	0.07866	1.419	1.004
5		1.597	37.58	0.288	0.0971	1.269	1.005		5		2.394	25.06	0.53	0.1242	1.799	1.162
6		1.958	30.64	0.4195	0.127	1.426	1.019		6		3.501	17.14	0.486	0.1638	1.84	0.9836
7		1.985	30.23	0.3644	0.096	1.03	0.7313		7		2.623	22.87	0.556	0.1174	1.736	1.072
	Average	1.86614	32.4429	0.3455	0.106981	1.27033	0.925864			Average	2.79743	22.1314	0.658957	0.110264	1.68957	1.01737
	Stdev	0.18897	3.3479	0.0428633	0.0226582	0.169815	0.114449			Stdev	0.517244	4.38752	0.191009	0.0333683	0.154632	0.0870405
	SEM	0.0714241	1.26539	0.0162008	0.00856399	0.0693266	0.0467235			SEM	0.1955	1.65833	0.0721947	0.012612	0.0584453	0.0328982

## Sheet: In situ hybridization
	Performed	American alligator				Cuvier's dwarf caiman			American alligator
		Developmental				Developmental			Juvenile (also optical mapping)
	Genes	St13	St16	St18		St13	St16		1	2	3	4	5	6	7
	ctni	+	+	+		+	+		+	+	+	+	+	+	+
	Tbx3	+	+	+		+	+		+	+	+	+	+	+	+
	Tbx5	+	+	+		+	+		+	np	np	np	np	np	+
	Cx40	+	+	+		+	+		+	+	np	np	np	np	+
	Scn5a	+	+	+		np	np		np	nd	np	np	np	np	nd
	Nppb	np	+	np		np	np		+	+	np	+	+	+	np
	Nppa	np	+	np		np	np		+	+	np	+	+	+	np
	Hey2	np	+	np		np	+		np	np	np	np	np	np	np
	aMYH	np	np	np		np	np		np	+	np	np	np	np	np
	Picro-sirius red	np	np	np		np	np		+	+	+	+	+	+	+
	+, detected
	nd, not detected
	np, not performed
	Appears in Figure
	Genes	St13	St16	St18		St13	St16		1	2	3	4	5	6	7
	ctni	+	+	Figure 3-figure supplement 1		+	Figure 3-figure supplement 1		+	Figure 6, Figure 3-figure supplement 2AC	+	+	+	+	+
	Tbx3	+	Figure 3A	Figure 3-figure supplement 2		+	Figure 3-figure supplement 2		+	Figure 3-figure supplement 2AC	+	+	Figure 4	+	+
	Tbx5	+	Figure 3A	Figure 3-figure supplement 2		+	Figure 3-figure supplement 2		+	np	np	np	np	np	+
	Cx40	+	Figure 3A	+		+	+		+	Figure 3-figure supplement 2, Figure 6-figure supplement 2	np	np	np	np	+
	Scn5a	+	Figure 3A	+		np	np		np	nd	np	np	np	np	nd
	Nppb	np	Figure 5-6	np		np	np		Figure 6-figure supplement 1	Figure 6	np	Figure 6-figure supplement 1	Figure 6-figure supplement 1	Figure 6-figure supplement 1	np
	Nppa	np	Figure 5	np		np	np		Figure 6-figure supplement 1	+	np	Figure 6-figure supplement 1	Figure 6-figure supplement 1	Figure 6-figure supplement 1	np
	Hey2	np	Figure 6	np		np	+		np	np	np	np	np	np	np
	aMYH	np	np	np		np	np		np	Figure 3-figure supplement 2	np	np	np	np	np
	Picro-sirius red	np	np	np		np	np		+	+	+	+	Figure 4	+	+

## Sheet: Figure 7EF
		Figure 7E	Figure 7F
Animal	Temperature (Celcius)	Heart Rate (BPM)	QRS Interval (s)
#1	21.7	22.5	0.1083
	23	24.54	0.1013
	25	28.86	0.09531
	27	31.9	0.09079
	29	34.99	0.0923
	31	39.77	0.08861
	33	41.74	0.08562
	35	46.3	0.08484
	35.2	44.66	0.07153
#2	23	20.72	0.1332
	25	24.15	0.1171
	27	27.88	0.1131
	29	32.08	0.1002
	31	35.76	0.07212
	33	40.44	0.07194
	35	45.28	0.07326
	36.2	47.37	0.08103
#3	24.5	17.24	0.1237
	25	19.38	0.1159
	27	25.66	0.109
	29	31.49	0.09222
	31	34.77	0.09258
	33	41.85	0.08735
	35	49.93	0.086
	35.2	49.7	0.086
#4	22.6	17.26	0.1548
	23	20.4	0.1354
	25	25.45	0.121
	27	29.48	0.1216
	29	32.83	0.1175
	31	38.67	0.1205
	33	40.84	0.1094
	35	41.75	0.1059
	35.6	43.11	0.1122
AVG	23	21.8867	0.1233
	25	24.46	0.112327
	27	28.73	0.108622
	29	32.8475	0.100555
	31	37.2425	0.0934525
	33	41.2175	0.0885775
	35	45.815	0.0875
STD	23	3.64148	0.0269147
	25	3.92609	0.011552
	27	2.63051	0.0129949
	29	1.52998	0.0119006
	31	2.362	0.0200902
	33	0.68801	0.0154988
	35	3.36546	0.0135482
