# Supplementary material for: Specialized impulse conduction pathway in the alligator heart
Source: eLife journal article supplement (doi:10.7554/elife.32120), 2018-03-22
Supplement: supp [file elife_poa_e32120_Transparent_Reporting_File.docx]

***eLife’s* transparent reporting form**

We encourage authors to provide detailed information *within their submission* to facilitate the interpretation and replication of experiments. Authors can upload supporting documentation to indicate the use of appropriate reporting guidelines for health-related research (see [EQUATOR Network](http://www.equator-network.org/%20)), life science research (see the [BioSharing Information Resource](https://biosharing.org/)), or the [ARRIVE guidelines](http://www.plosbiology.org/article/info:doi/10.1371/journal.pbio.1000412) for reporting work involving animal research. Where applicable, authors should refer to any relevant reporting standards documents in this form.

If you have any questions, please consult our Journal Policies and/or contact us: [editorial@elifesciences.org](mailto:editorial@elifesciences.org).

**Sample-size estimation**

- You should state whether an appropriate sample size was computed when the study was being designed
- You should state the statistical method of sample size computation and any required assumptions
- If no explicit power analysis was used, you should describe how you decided what sample (replicate) size (number) to use

Please outline where this information can be found within the submission (e.g., sections or figure legends), or explain why this information doesn’t apply to your submission:

We did not calculate an appropriate samples size when the study was being designed. This is because cardiac electrophysiology of the Alligator has seldom been studied leading to unknown effect size of interest and standard deviation, both required for power and sample size calculation. We studied 7 alligators, which is within the commonly accepted samples sizes for studying electrophysiology in similar sized mammals (rat and rabbit) and supported by the local and national animal ethical committee. Further details are addressed in “Statistics” (page 18) in Material and Methods and all main and supplemental figure legends.

**Replicates**

- You should report how often each experiment was performed
- You should include a definition of biological versus technical replication
- The data obtained should be provided and sufficient information should be provided to indicate the number of independent biological and/or technical replicates
- If you encountered any outliers, you should describe how these were handled
- Criteria for exclusion/inclusion of data should be clearly stated
- High-throughput sequence data should be uploaded before submission, with a private link for reviewers provided (these are available from both GEO and ArrayExpress)

Please outline where this information can be found within the submission (e.g., sections or figure legends), or explain why this information doesn’t apply to your submission:

The information on the number of replicates is specified in the Material and Methods section (page 12-17). We excluded the *in vivo* derived ECG parameters of one alligator from further analysis because it was not spontaneously activate after isolation. We have uploaded the alligator RNAseq dataset The Sequence Read Archive, which will be made available upon publication of the manuscript.

**Statistical reporting**

- Statistical analysis methods should be described and justified
- Raw data should be presented in figures whenever informative to do so (typically when N per group is less than 10)
- For each experiment, you should identify the statistical tests used, exact values of N, definitions of center, methods of multiple test correction, and dispersion and precision measures (e.g., mean, median, SD, SEM, confidence intervals; and, for the major substantive results, a measure of effect size (e.g., Pearson's r, Cohen's d)
- Report exact p-values wherever possible alongside the summary statistics and 95% confidence intervals. These should be reported for all key questions and not only when the p-value is less than 0.05.

Please outline where this information can be found within the submission (e.g., sections or figure legends), or explain why this information doesn’t apply to your submission:

The statistical methods are addressed in the “Material and Methods” section of the manuscript. In short, statistical significance was investigate using paired t-test and one-way ANOVA. We refer to figure legends for further specifications.

(For large datasets, or papers with a very large number of statistical tests, you may upload a single table file with tests, Ns, etc., with reference to sections in the manuscript.)

**Group allocation**

- Indicate how samples were allocated into experimental groups (in the case of clinical studies, please specify allocation to treatment method); if randomization was used, please also state if restricted randomization was applied
- Indicate if masking was used during group allocation, data collection and/or data analysis

Please outline where this information can be found within the submission (e.g., sections or figure legends), or explain why this information doesn’t apply to your submission:

In this study we investigated 14 control alligators (7 adults *in vivo* and *ex vivo* and *in situ*, 4 adult *in vivo* and 3 embryonic alligators *in situ*) and 2 embryonic caiman alligators. For further details we refer to the Material and Method sections (page 12-17).

**Additional data files (“source data”)**

- We encourage you to upload relevant additional data files, such as numerical data that are represented as a graph in a figure, or as a summary table
- Where provided, these should be in the most useful format, and they can be uploaded as “Source data” files linked to a main figure or table
- Include model definition files including the full list of parameters used
- Include code used for data analysis (e.g., R, MatLab)
- Avoid stating that data files are “available upon request”

Please indicate the figures or tables for which source data files have been provided:

We provide source data for Figure 1-4 and supplemental Figure 1-8. The optical recorded signals were analyzed using a custom made Matlab based software called Rhythm (Am J Physiol Heart Circ Physiol. 2012 Oct 1;303(7):H753-65.)
